# Supplementary material for: Detectable mutations precede late myeloid neoplasia in aplastic anemia
Source: PubMed Central journal article supplement — Haematologica. 2020 Sep 10;106(2):647–50. doi: 10.3324/haematol.2020.263046 (PMC7849750; doi:10.3324/haematol.2020.263046), 2020-09-10
Supplement: 2020_263046-Disclosures_Contributions.pdf [file 2020_263046-Disclosures_Contributions.pdf]

Haematologica  
HAEMATOL/2020/263046  
Version 3

Detectable mutations precede late myeloid neoplasia in aplastic  
anemia

Bhavisha A. Patel, Jack Ghannam, Emma M. Groarke, Meghali  
Goswami, Laura Dillon, Fernanda Gutierrez-Rodrigues, Olga Rios,  
Diego Quinones Raffo, Jennifer Lotter, Neal S. Young, and Christopher  
S. Hourigan

Disclosures: Eltrombopag was provided by GlaxoSmithKline and Novartis under a Clinical Trials Agreement with NIH, which included research funding for additional experimental laboratory studies.

Contributions: B.A.P, E.M.G, N.S.Y designed the study and performed clinical analyses; J.G, M.G, L.D, D.Q. performed laboratory studies and analyses; B.A.P, E.M.G, N.S.Y, O.R, J.L provided clinical care; B.A.P, E.M.G, J.G, F.G.R, C.S.H, and N.S.Y wrote and edited the manuscript.
