# Supplementary material for: Detectable mutations precede late myeloid neoplasia in aplastic anemia
Source: PubMed Central journal article supplement — Haematologica. 2020 Sep 10;106(2):647–50. doi: 10.3324/haematol.2020.263046 (PMC7849750; doi:10.3324/haematol.2020.263046), 2020-09-10
Supplement: 2020_263046_PATEL_SUPPL.pdf [file 2020_263046_PATEL_SUPPL.pdf]

**Detectable mutations precede late myeloid neoplasia in aplastic anemia**

---

*Bhavisha A. Patel,\* Jack Ghannam,\* Emma M. Groarke,\* Meghali Goswami, Laura Dillon, Fernanda Gutierrez-Rodrigues, Olga Rios, Diego Quinones Raffo, Jennifer Lotter, Neal S. Young# and Christopher S. Hourigan#*

*Hematology Branch, National Heart, Lung, and Blood Institute (NHLBI), Bethesda, MD, USA*

*\*BAP, JG, and EMG contributed equally as co-first authors.*

*\*CSH and NSY contributed equally as co-senior authors*

*Correspondence: NEAL S. YOUNG - [youngns@nhlbi.nih.gov](mailto:youngns@nhlbi.nih.gov)*

*doi:10.3324/haematol.2020.263046*

SUPPLEMENTARY DATA

**Detectable mutations precede late myeloid neoplasia in aplastic anemia**

Bhavisha A. Patel<sup>1\*</sup>, Jack Ghannam<sup>1\*</sup>, Emma M. Groarke<sup>1\*</sup>, Meghali Goswami<sup>1</sup>, Laura W. Dillon<sup>1</sup>,  
Fernanda Gutierrez-Rodrigues<sup>1</sup>, Olga Rios<sup>1</sup>, Diego Quinones Raffo<sup>1</sup>, Jennifer Lotter<sup>1</sup>, Neal S.  
Young<sup>1†</sup>, Christopher S. Hourigan<sup>1†</sup>

**Table of contents**

|                                                                                          |   |
|------------------------------------------------------------------------------------------|---|
| Supplemental Table 1A. Methods and samples used for mutation discovery and tracking..... | 2 |
| Supplemental Table 1B. Clinical NGS Results from UPN 3 (unsorted bone marrow).....       | 2 |

**Supplemental Table 1**

| <b>A) Methods and samples used for mutation discovery and tracking</b> |                                                |                         |
|------------------------------------------------------------------------|------------------------------------------------|-------------------------|
|                                                                        | <b>At clonal evolution</b>                     | <b>Prior timepoints</b> |
| <b>UPN 1</b>                                                           | Research NGS (CD117 sorted PBMCs)              | ddPCR ( <i>NPM1</i> )   |
| <b>UPN 2</b>                                                           | Research NGS (CD117 sorted PBMCs)              | ddPCR ( <i>RUNX1</i> )  |
| <b>UPN 3</b>                                                           | Clinical NGS, scDNA-seq                        | Clinical NGS            |
| <b>UPN 4</b>                                                           | Clinical NGS, Research NGS (CD34 sorted PBMCs) | ddPCR ( <i>RUNX1</i> )  |

DNA-sequencing was performed using targeted myeloid panels of commonly mutated gene regions in myeloid malignancies by either a commercial clinical laboratory (“Clinical NGS”) or using an anchored multiplex PCR-based panel incorporating molecular barcode/unique molecular identifiers (ArcherDx, CO) in a NIH research laboratory (“Research NGS”).

ddPCR was performed using approximately 1µg of DNA isolated from bone marrow cells (BMCs), using Custom TaqMan SNP Genotyping Assays (cat# 4351379, Thermo Fisher Scientific, Waltham, MA) on the RainDrop platform (RainDance Technologies, Lexington, MA). Data were analyzed using RainDrop Analyst II software.

Single-cell DNA sequencing (scDNA-seq) assay utilizing cell-identifying molecular barcodes, covering 45-genes commonly mutated in myeloid malignancies (Mission Bio, CA), was employed on BMCs from one patient, with paired-end 150-bp sequencing performed utilizing unique dual sample indices on an Illumina HiSeq 2500 (rapid run mode).

FASTQ files are available in the NCBI Small Reads Archive (SRA) (Accession: PRJNA645315).

### **B) Clinical NGS Results from UPN 3 (unsorted bone marrow)**

| <b>Gene</b>   | <b>Mutation</b>                | <b>Baseline (%)</b> | <b>Year 2 (%)</b> | <b>Year 4 (%)</b> | <b>Year 5 (%)</b> | <b>Year 7 (%)</b> |
|---------------|--------------------------------|---------------------|-------------------|-------------------|-------------------|-------------------|
| <i>ASXL1</i>  | c.1900_1922del; p.E635RfsTer15 | 19.3                | 24.6              | 42.0              | 50.7              | 23.3              |
| <i>RUNX1</i>  | c.319C>T; p.R107C              |                     | 33.3              | 33.3              | 44.4              | 51.6              |
| <i>SETBP1</i> | c.2602G>A; D868N               |                     |                   | 38.8              | 39.4              | 53.1              |
| <i>PHF6</i>   | c.821G>A; p.R274Q              |                     |                   |                   |                   | 5.7               |
